# Supplementary material
Source: PubMed Central journal article supplement (PMC2871981)

## Supplementary Data:

To perform the bootstrap procedure for the chemical exposure data, random samples of residuals or approximate errors from the model fitted in equation {1} were selected. Bootstrap responses were then generated by adding these residuals to the fitted values from the model. This procedure is called bootstrapping residuals (Efron, Bradley, and Tibshirani, R.J. (1993) An introduction to the bootstrap. New York: Chapman & Hall) Equation {1} was then refit to the bootstrapped data.

This procedure was repeated 200 times for each experiment. Empirical quantiles for the 200 bootstrap parameter estimates were used to calculate 95% confidence intervals and BMCL values presented in Supplemental Tables 1 and 2. For some bootstrapped datasets, the model parameters failed to converge, and additional bootstrap samples were generated. The actual numbers of bootstrap samples needed to create 200 bootstrap parameter estimates are given in Supplemental Tables 1 and 2. The value for the model error in the fit of the Hill function,  $\sigma$ , is shown. Larger values of  $\sigma$  often corresponded to higher rates of non-convergence of model parameters. Also provided is the p-value for the chi-squared statistic comparing the fitted Hill model from equation {1} to the null or mean model.

**Supplemental Table 1**

**Estimated EC50s and 95% bootstrap confidence intervals, as well as BMCs and bootstrap BMCLs for 12 chemicals based on 3 repetitions of the *C. elegans* reproduction assay**

| Chemical  | Strain | EC50  | Bootstrap EC50 95% CI | BMC  | Bootstrap BMCL | Sigma  | actual number of bootstrap samples | p-value  |
|-----------|--------|-------|-----------------------|------|----------------|--------|------------------------------------|----------|
| Diquat    | myo2   | 0.76  | (0.66, 0.86)          | 0.06 | 0.03           | 54.91  | 216                                | 7.71E-13 |
|           |        | 0.8   | (0.69, 0.91)          | 0.05 | 0.02           | 58.09  | 210                                | 1.24E-12 |
|           |        | 0.68  | (0.49, 0.88)          | 0.06 | 0.01           | 112.98 | 229                                | 3.59E-09 |
| EMS       | N2     | 4.66  | (4.19, 5.12)          | 3.77 | 2.83           | 173.69 | 282                                | 7.05E-09 |
|           |        | 4.67  | (4.35, 4.99)          | 4.12 | 3.41           | 110.04 | 430                                | 5.84E-10 |
|           |        | 4.77  | (4.54, 5.00)          | 4.03 | 3.43           | 132.27 | 352                                | 1.75E-11 |
| Caffeine  | myo2   | 8.9   | (7.58, 10.22)         | 1.85 | 1.10           | 62.91  | 204                                | 6.47E-12 |
|           |        | 12.65 | (11.28, 14.02)        | 3.43 | 2.10           | 57.03  | 206                                | 7.54E-13 |
|           |        | 8.74  | (7.16, 10.32)         | 2.09 | 1.15           | 99.04  | 206                                | 5.98E-11 |
| Methadone | N2     | 0.21  | (0.19, 0.22)          | 0.06 | 0.04           | 76.76  | 266                                | 9.20E-13 |
|           |        | 0.27  | (0.26, 0.29)          | 0.06 | 0.04           | 61.19  | 236                                | 4.90E-14 |
|           |        | 0.38  | (0.34, 0.42)          | 0.06 | 0.03           | 93.42  | 233                                | 9.27E-11 |
| Parathion | myo2   | 2.17  | (2.01, 2.32)          | 1.31 | 1.02           | 69.95  | 224                                | 1.14E-13 |
|           |        | 1.22  | (1.07, 1.36)          | 0.43 | 0.26           | 69.85  | 216                                | 1.09E-12 |
|           |        | 1.14  | (1.08, 1.20)          | 0.69 | 0.56           | 47.76  | 252                                | 2.44E-15 |
| Paraquat  | N2     | 1.68  | (1.08, 2.28)          | 0.29 | 0.06           | 166.14 | 213                                | 1.72E-07 |
|           |        | 1.74  | (1.47, 2.01)          | 0.98 | 0.64           | 112.6  | 232                                | 4.96E-10 |
|           |        | 2.35  | (2.01, 2.69)          | 0.46 | 0.24           | 67.61  | 214                                | 5.24E-11 |

|               |      |        |                  |        |        |            |     |          |
|---------------|------|--------|------------------|--------|--------|------------|-----|----------|
| Ascorbic acid | N2   | 1.35   | (1.27, 1.43)     | 0.82   | 0.66   | 85.87      | 229 | 6.97E-12 |
|               |      | 1.7    | (1.63, 1.78)     | 1.21   | 1.03   | 60.68      | 263 | 1.07E-11 |
|               |      | 1.49   | (1.40, 1.58)     | 1.02   | 0.82   | 74.43      | 257 | 1.07E-10 |
| Acetic acid   | myo2 | 1.04   | (1.01, 1.07)     | 0.88   | 0.78   | 60.99      | 247 | 2.38E-13 |
|               |      | 0.96   | (0.92, 1.00)     | 0.68   | 0.58   | 58.19      | 308 | 8.38E-14 |
|               |      | 1.18   | (1.15, 1.21)     | 0.89   | 0.81   | 34.08      | 268 | 1.11E-16 |
| Cadmium       | N2   | 185.69 | (169.92, 201.46) | 168.96 | 137.54 | 124.4      | 344 | 8.92E-09 |
|               |      | 175.96 | (158.08, 193.85) | 132.28 | 95.28  | 131.2<br>1 | 213 | 4.13E-09 |
|               |      | 192.16 | (186.53, 197.80) | 153.69 | 136.99 | 49.33      | 208 | 7.89E-14 |
|               | myo2 | 112.79 | (108.87, 116.71) | 80.61  | 71.58  | 59.26      | 205 | 4.55E-15 |
|               |      | 118.74 | (112.26, 125.22) | 89.38  | 76.77  | 77.92      | 208 | 1.28E-12 |
|               |      | 120.58 | (116.55, 124.62) | 72.42  | 62.89  | 46.55      | 205 | 1.22E-15 |
| DMSO          | N2   | 3.36   | (3.12, 3.59)     | 1.91   | 1.44   | 71.15      | 221 | 2.94E-10 |
|               |      | 2.94   | (2.79, 3.10)     | 2.06   | 1.62   | 61.45      | 230 | 1.12E-11 |
|               |      | 1.98   | (1.67, 2.29)     | 0.85   | 0.52   | 115.5<br>2 | 222 | 7.45E-09 |
|               | myo2 | 2.56   | (2.48, 2.65)     | 1.48   | 1.25   | 36.93      | 214 | 7.66E-15 |
|               |      | 2.48   | (2.41, 2.55)     | 1.42   | 1.21   | 32.69      | 223 | 5.55E-16 |
|               |      | 2.23   | (2.04, 2.42)     | 1.17   | 0.84   | 83.41      | 208 | 4.02E-11 |

## Supplemental Table 2

**Estimated BMpHs and 95% bootstrap upper confidence limits, as well as pH50s and 95% bootstrap confidence intervals for two acids based on 3 repetitions of the *C. elegans* reproduction assay**

| Acid     | Strain | BMpH | Bootstrap BMpH<br>95% upper limit | ph50 | Bootstrap<br>pH50 95%<br>CI | sigma  | Actual<br>number of<br>bootstrap<br>samples | p-value  |
|----------|--------|------|-----------------------------------|------|-----------------------------|--------|---------------------------------------------|----------|
| Acetic   | myo2   | 4.55 | 4.64                              | 4.41 | (4.37, 4.45)                | 131.19 | 201                                         | 8.97E-09 |
|          |        | 4.65 | 4.70                              | 4.45 | (4.43, 4.47)                | 53.68  | 202                                         | 9.69E-14 |
|          |        | 4.51 | 4.54                              | 4.37 | (4.36, 4.38)                | 29.28  | 202                                         | 1.11E-16 |
| Ascorbic | N2     | 4.26 | 4.53                              | 3.70 | (3.62, 3.78)                | 94.23  | 209                                         | 6.47E-10 |
|          |        | 3.73 | 3.83                              | 3.37 | (3.34, 3.40)                | 51.42  | 202                                         | 4.34E-11 |
|          |        | 4.47 | 4.82                              | 3.81 | (3.70, 3.93)                | 75.24  | 203                                         | 3.81E-10 |

## Supplemental Figure Legend

**Supplemental Figure 1. Effect of all chemicals on *C. elegans* reproduction.** Total number of offspring plotted against chemical concentration of wild-type or *myo-2::GFP* strains for all experiments. The solid, black vertical lines represent a 50% reduction in the total number of offspring ( $EC_{50}$ ). The dashed, black vertical lines represent the BMC, below which the reproductive rate is not significantly affected by chemical.

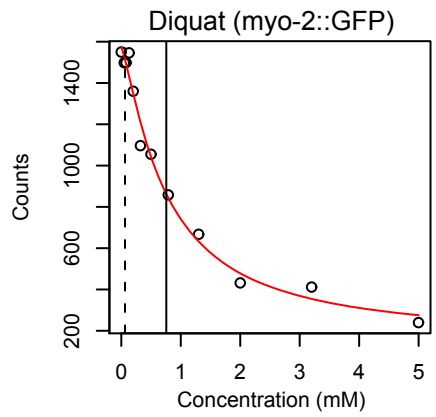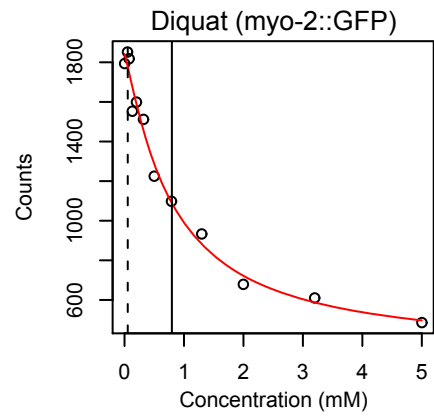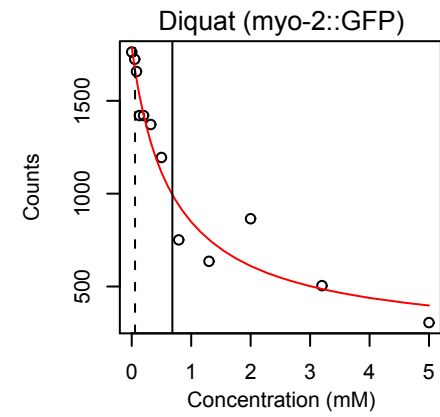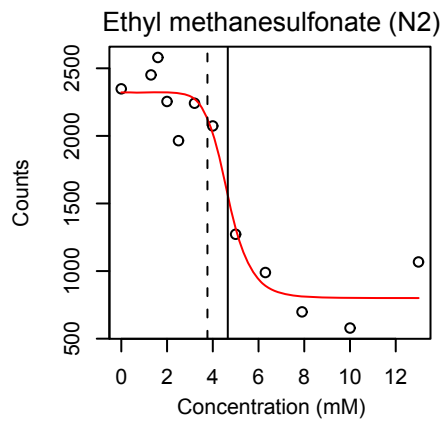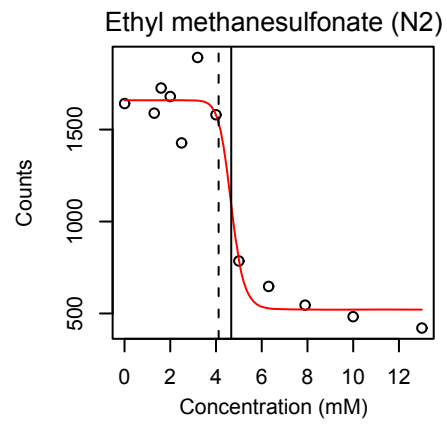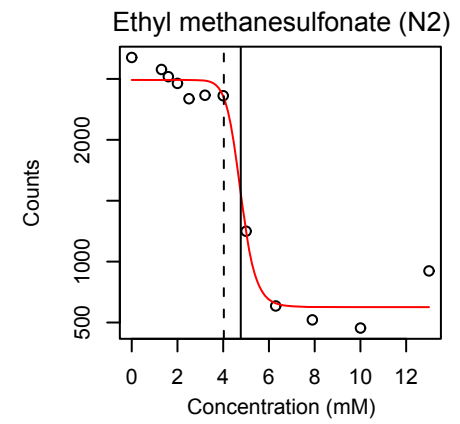

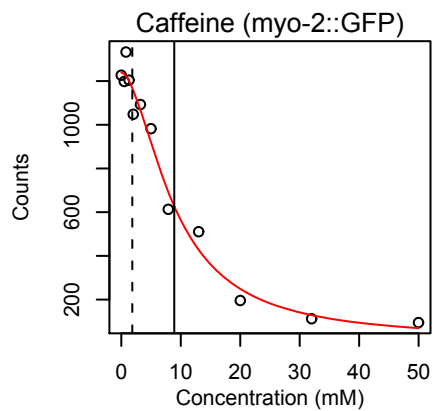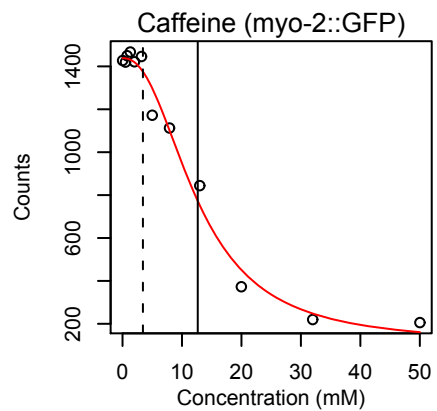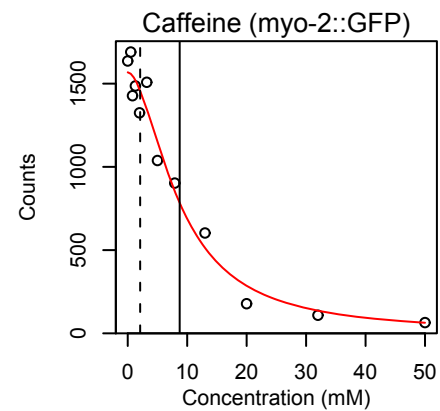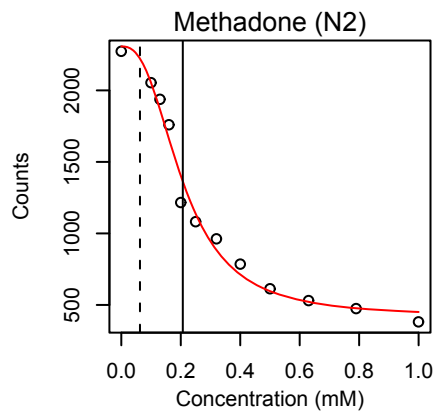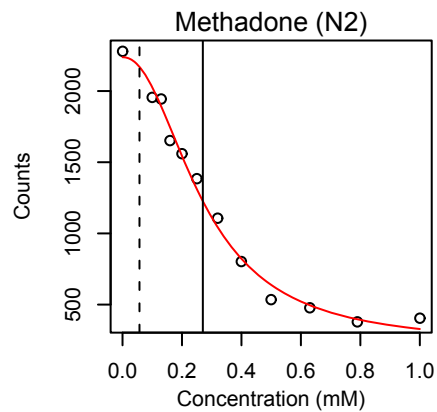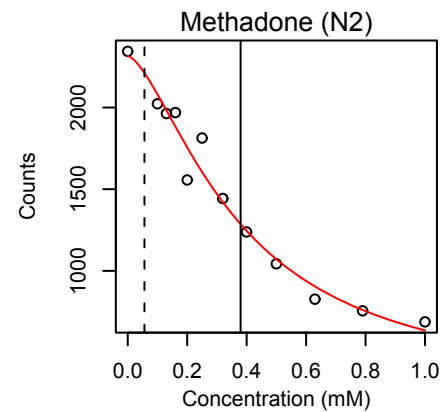

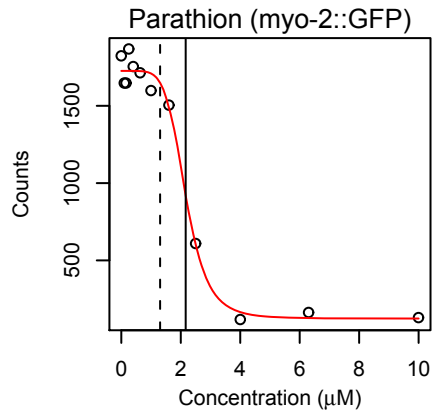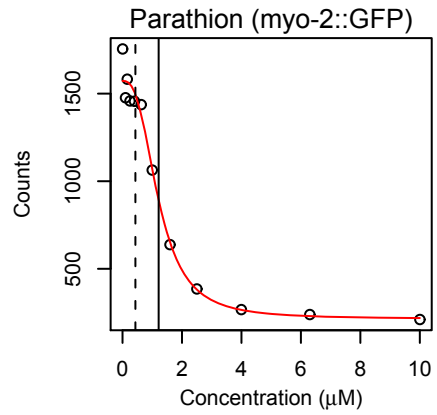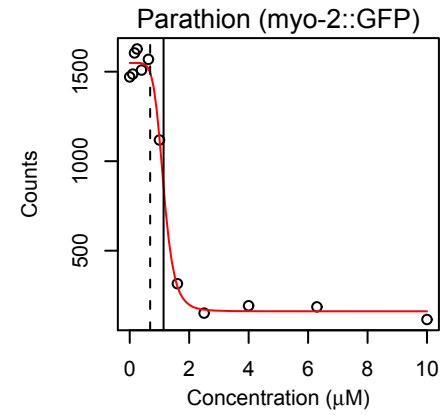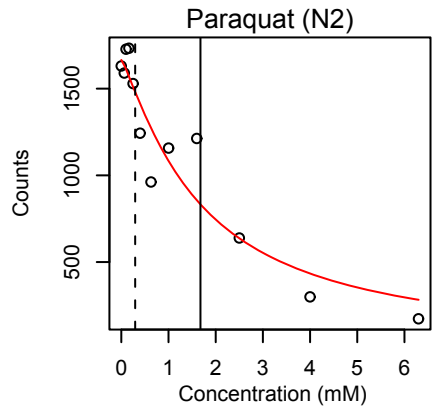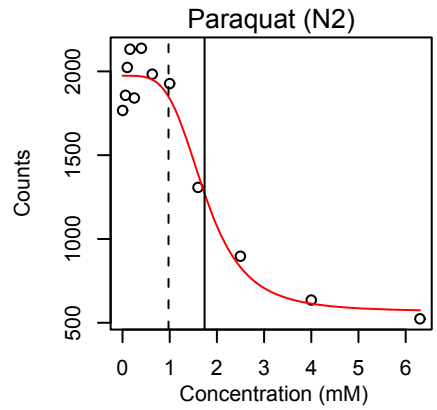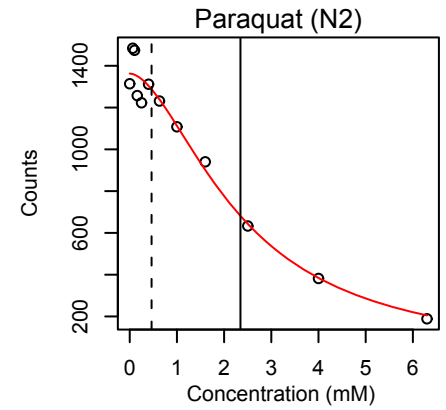



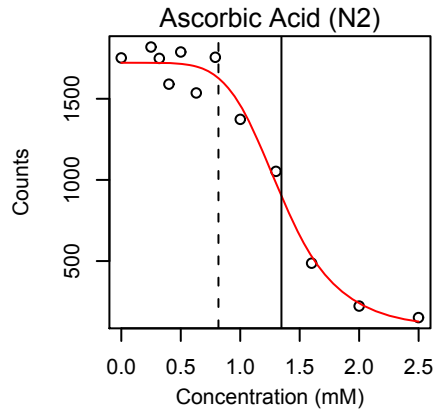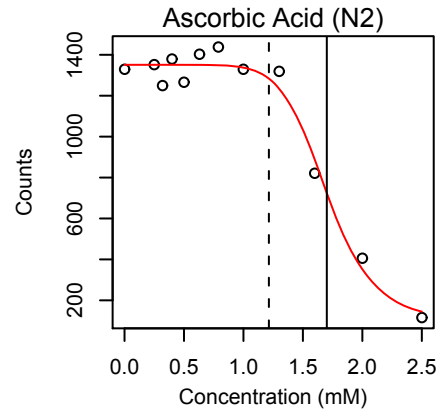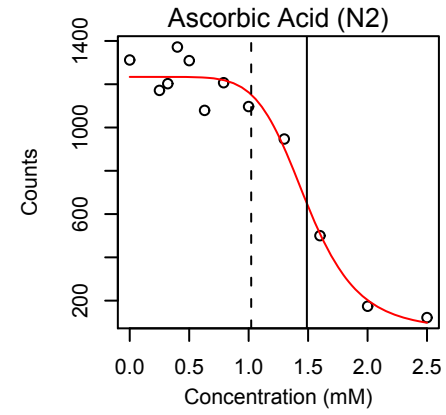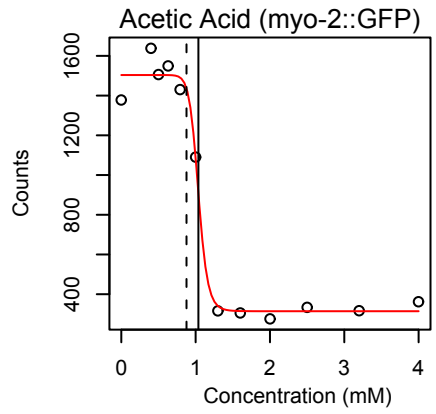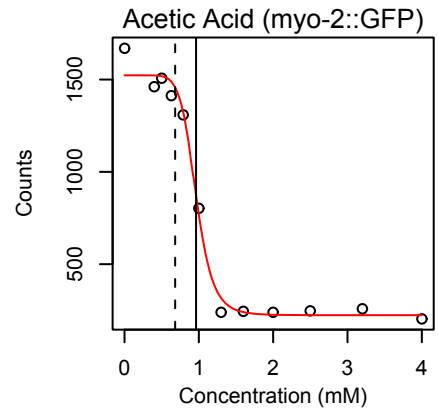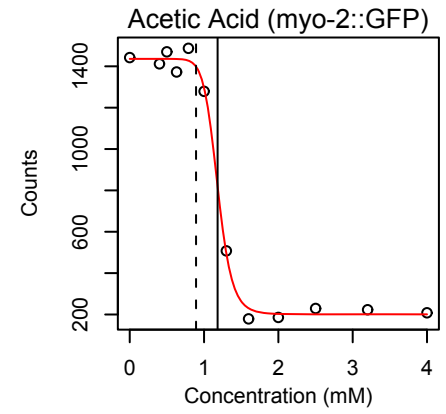

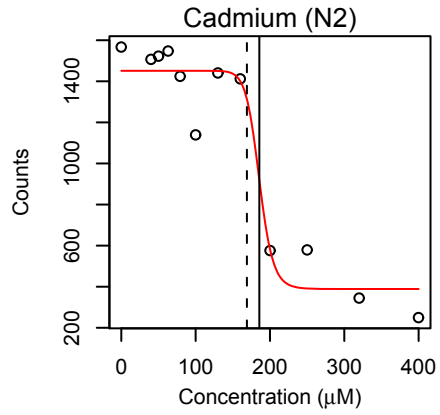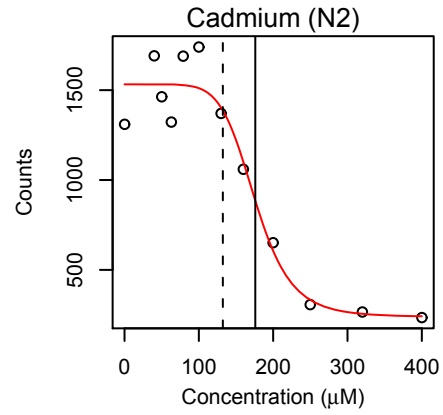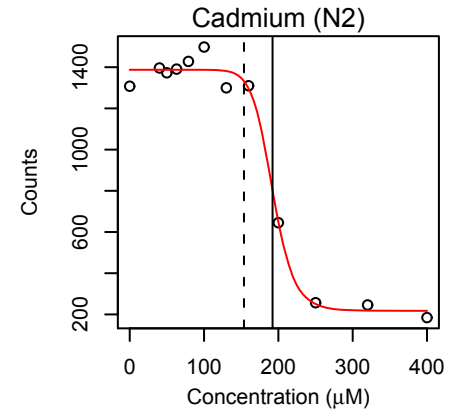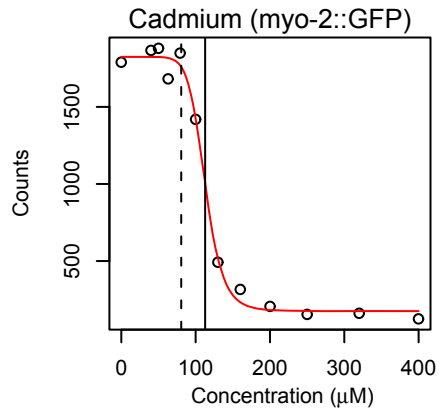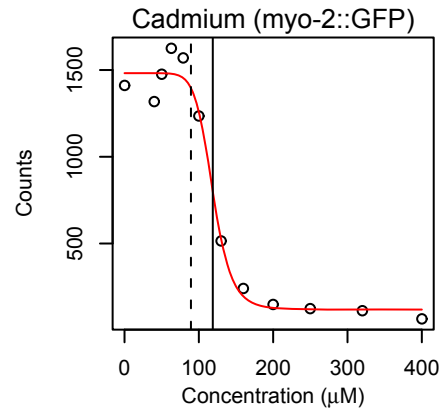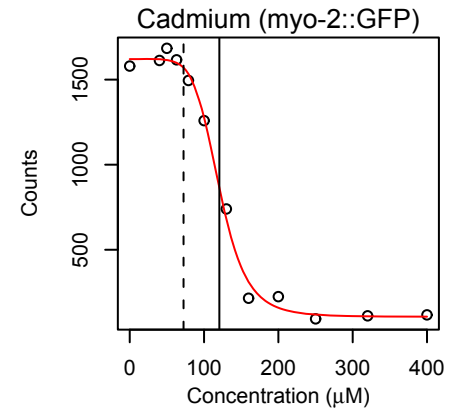

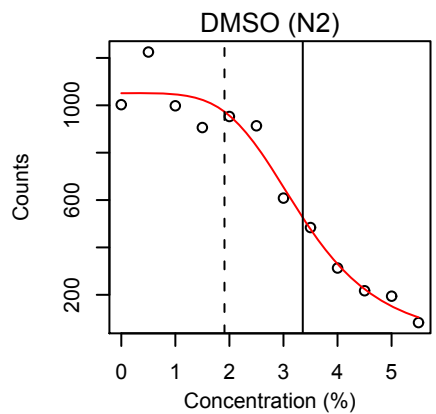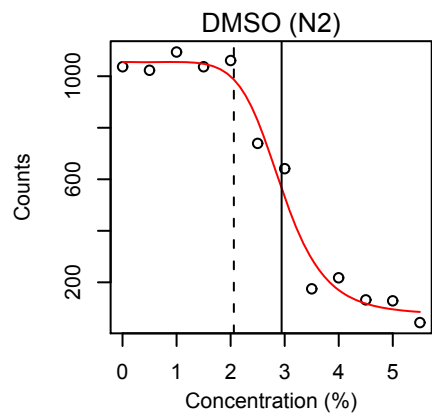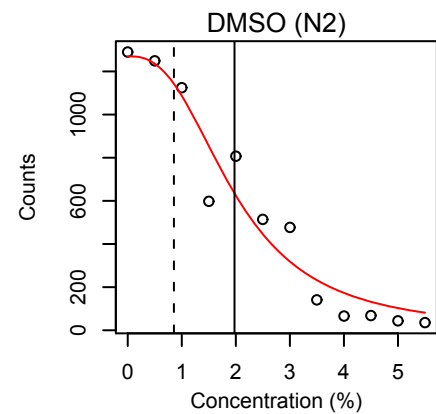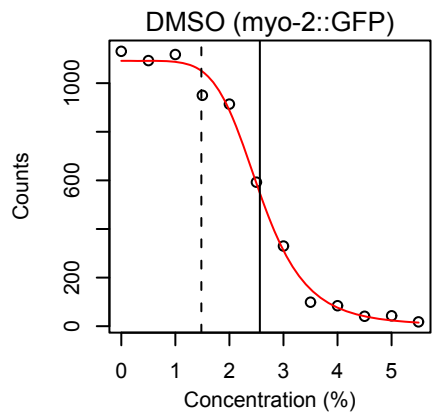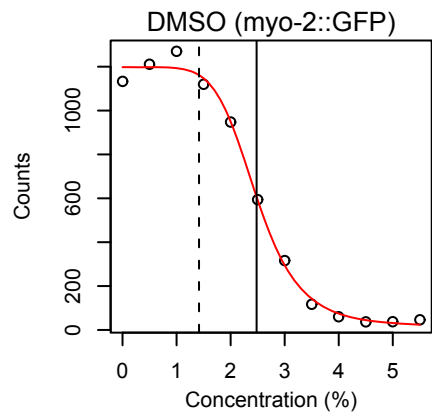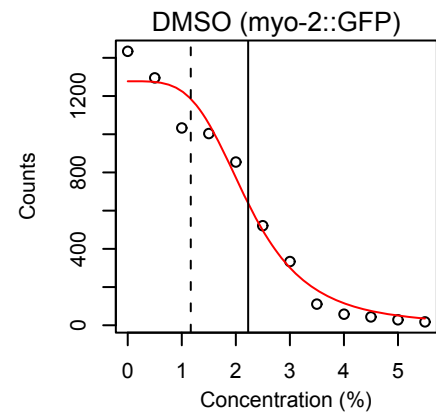

Supplement: NIHMS186306-supplement-01.pdf [file NIHMS186306-supplement-01.pdf]
